# Supplementary material
Source: PubMed Central journal article supplement (PMC4242801)
Supplement: NIHMS601562-supplement-01.pdf [file NIHMS601562-supplement-01.pdf]

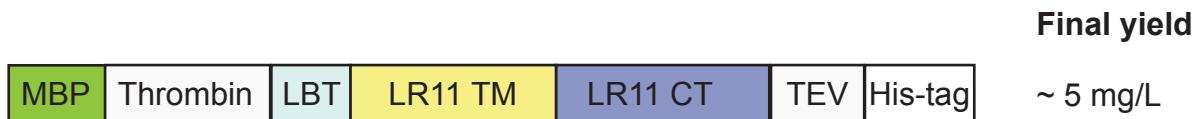

**Figure S1:** Expression construct and final yield of LR11 MTCT.  
 MBP: maltose binding protein. LBT: lanthanide binding tag. Both MBP and His-tag are removed for backbone assignment experiments.

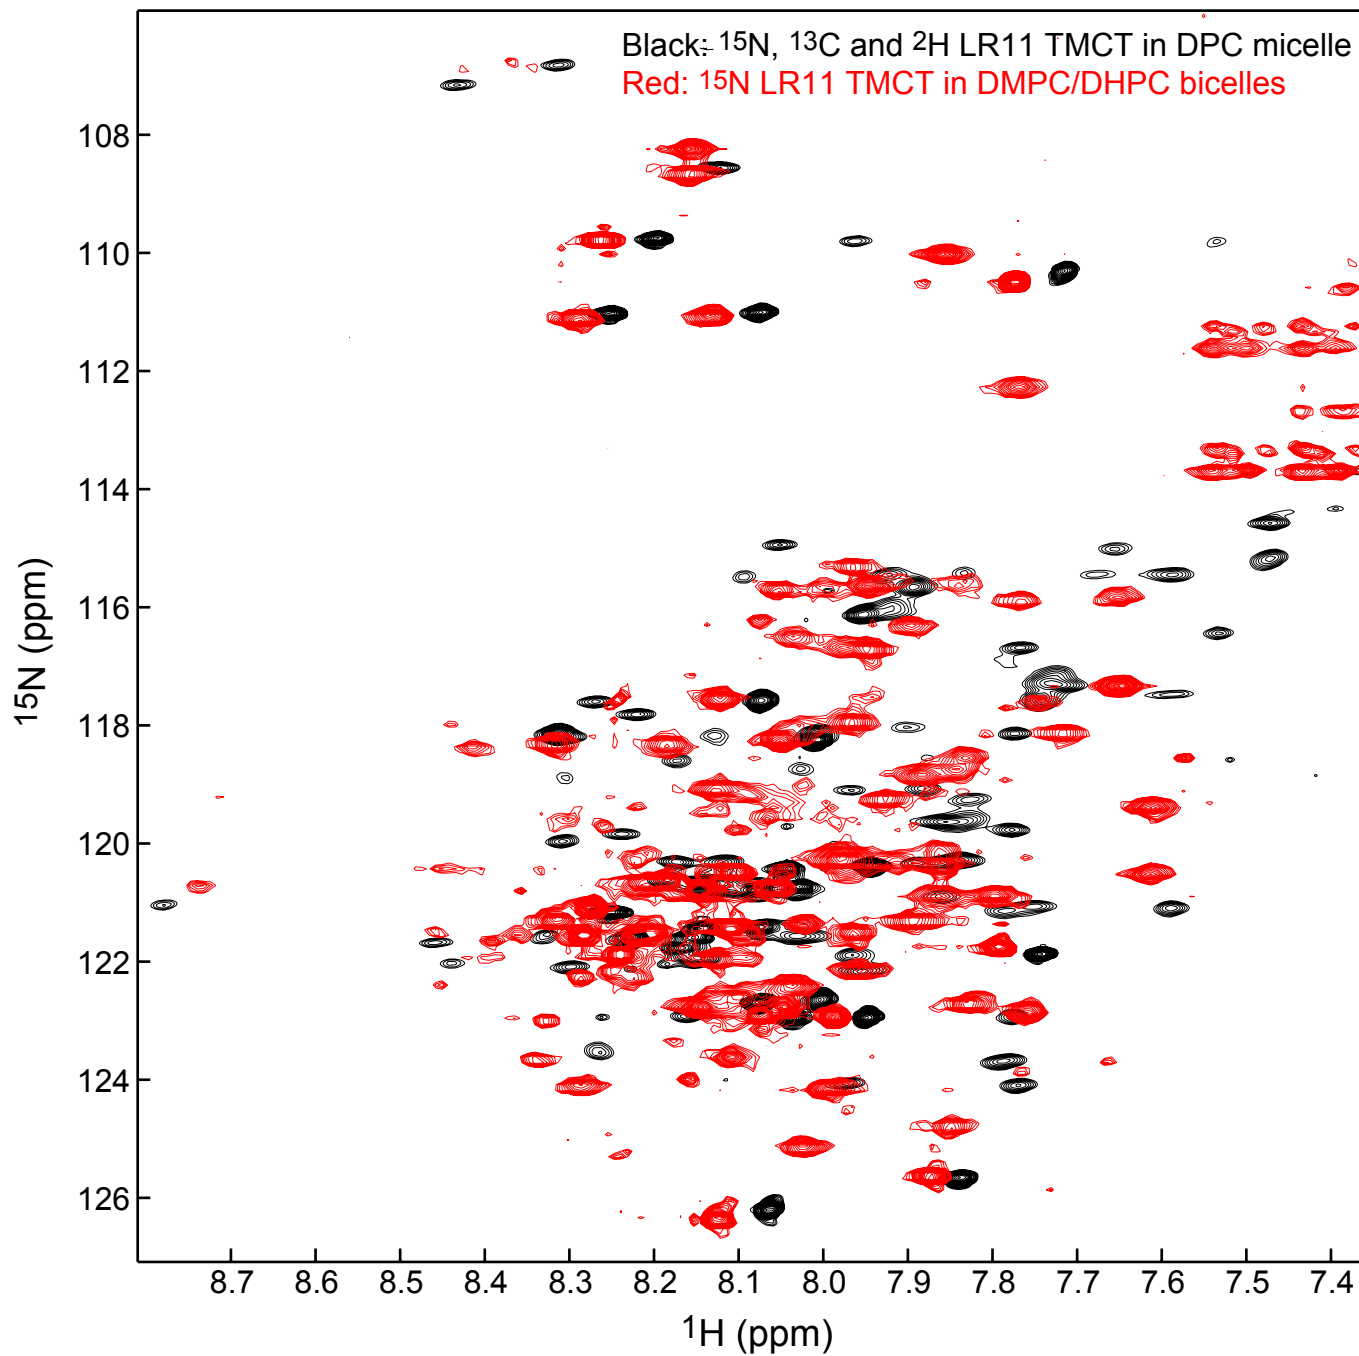

**Figure S2a:** Overlay of TROSY spectra of LR11 TMCT in DPC micelle and bicelles ( $q=0.3$ ).

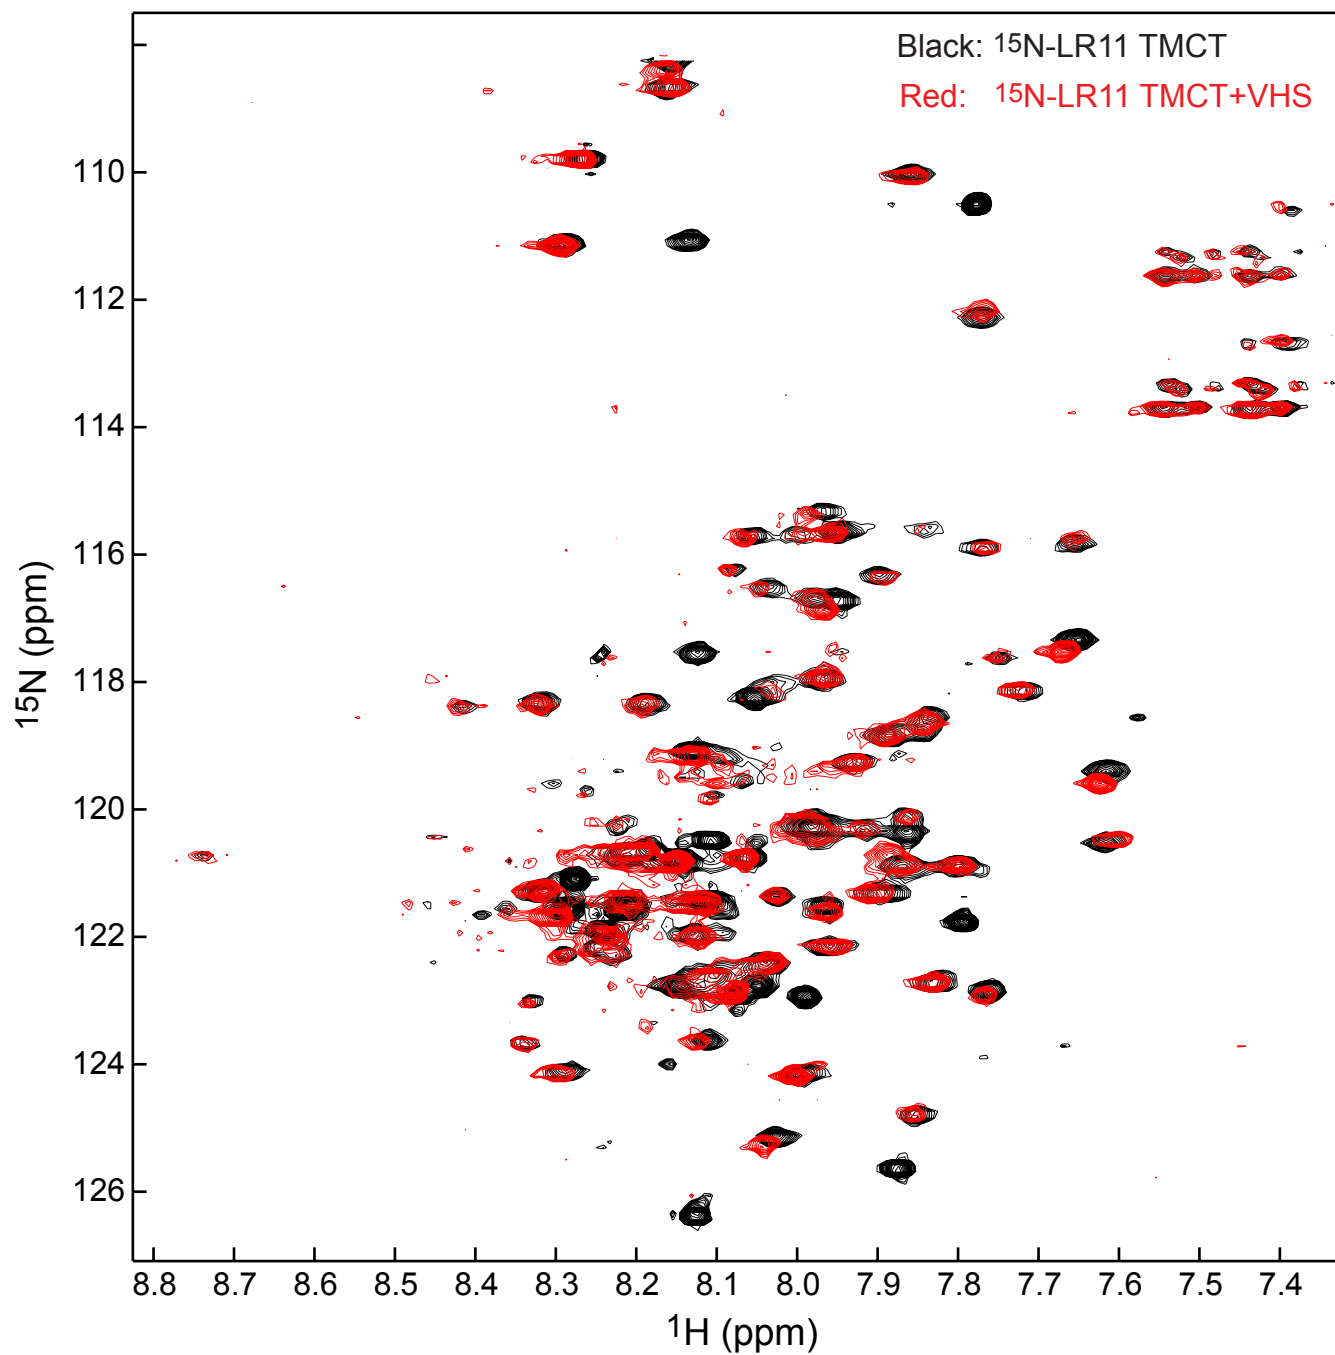

**Figure S2b:** TROSY spectra of  $^{15}\text{N}$ -LR11 TMCT in 12% DMPC/DHPC ( $q=0.3$ ) solution at 850 MHz spectrometer with and without the VHS domain of the GGA protein. GGA is an adaptor protein involved in LR11 intracellular trafficking (Jacobsen et al. 2002, FEBS Lett. 511: 155-158).

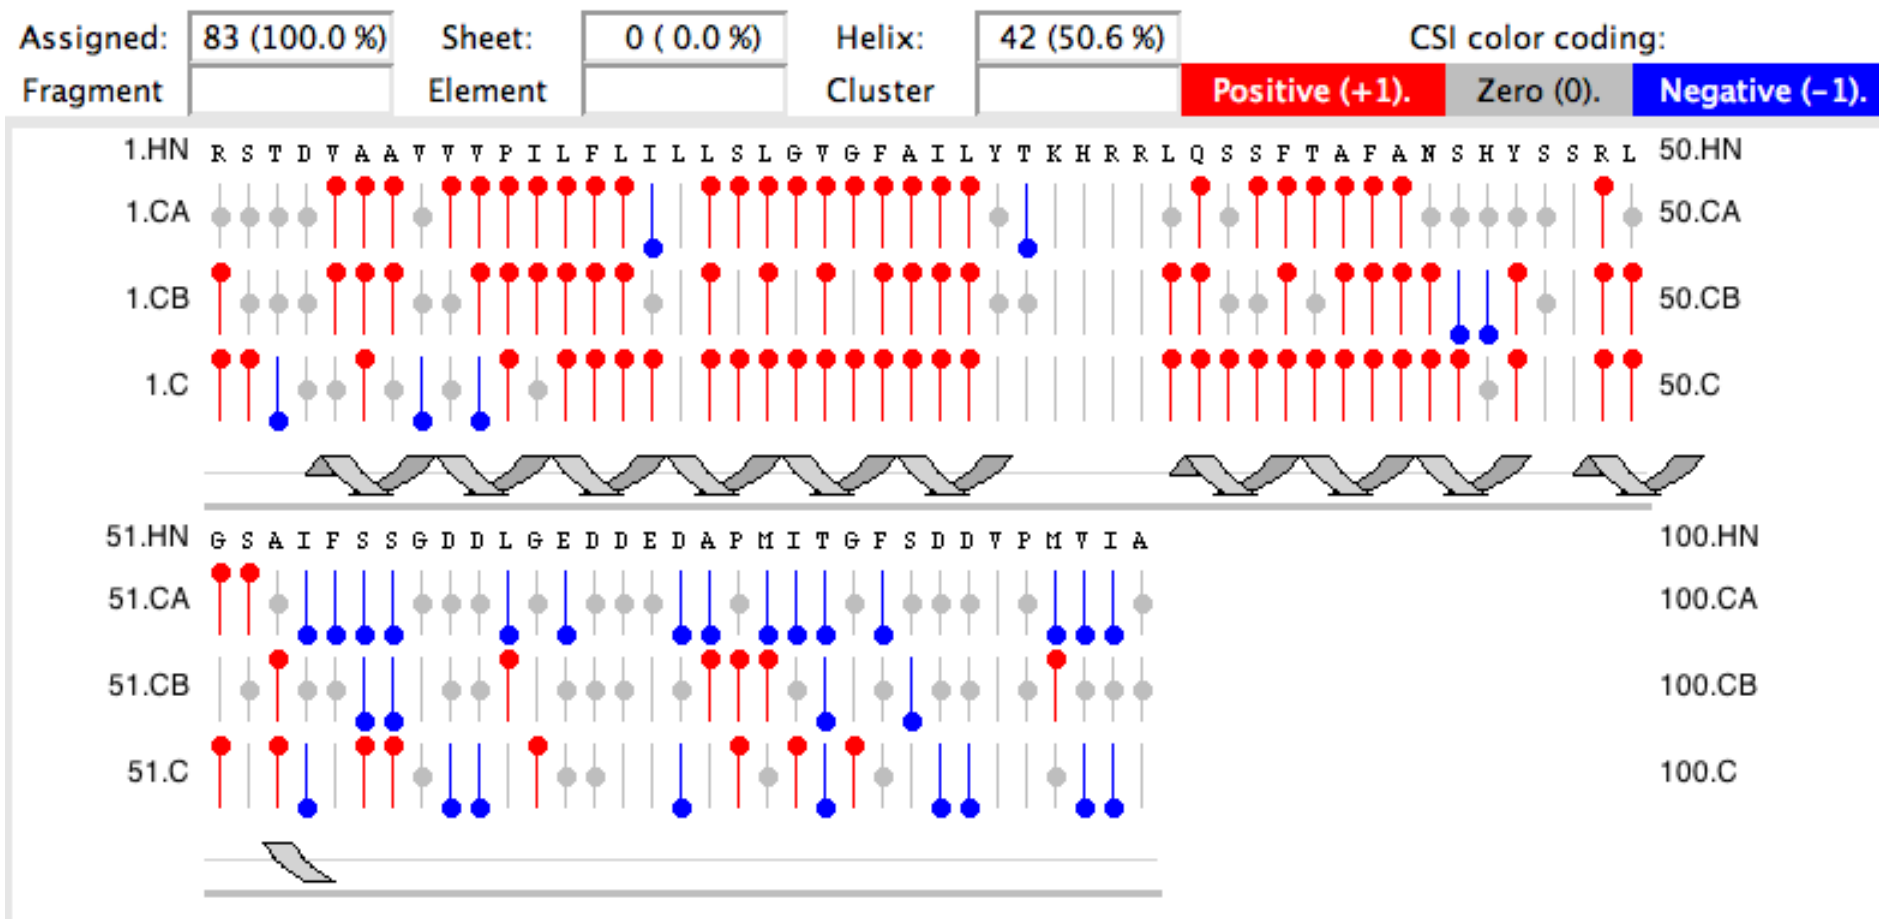

**Figure S3:** Chemical shift index (CSI) analysis of C', C<sub>α</sub>, and C<sub>β</sub> chemical shifts of LR11 TMCT.

**Table S1:** Predicted backbone torsion angles of LR11 TMCT using assigned chemical shifts of N, C<sup>α</sup>, C<sup>β</sup>, and C' in DPC solution by the TALOS+ program.

| VARS   | RESID | RESNAME  | PHI      | PSI    | DPHI   | DPSI    | DIST  | S2    | COUNT | CS_COUNT | CLASS |
|--------|-------|----------|----------|--------|--------|---------|-------|-------|-------|----------|-------|
| FORMAT | %4d   | %s       | %8.3f    | %8.3f  | %8.3f  | %8.3f   | %8.3f | %5.3f | %2d   | %2d      | %s    |
| 1      | R     | 9999.000 | 9999.000 | 0.000  | 0.000  | 0.000   | 0.000 | 0.000 | 0     | 8        | None  |
| 2      | S     | -121.639 | 139.493  | 33.967 | 35.223 | 28.279  | 0.632 | 10    | 12    | Warn     |       |
| 3      | T     | -62.871  | -43.087  | 6.802  | 7.823  | 30.904  | 0.717 | 10    | 12    | Good     |       |
| 4      | D     | -64.655  | -40.324  | 4.724  | 6.939  | 24.992  | 0.812 | 10    | 12    | Good     |       |
| 5      | V     | -61.251  | -46.812  | 7.637  | 5.987  | 22.102  | 0.855 | 10    | 12    | Good     |       |
| 6      | A     | -61.796  | -33.611  | 5.020  | 12.671 | 22.364  | 0.864 | 10    | 12    | Good     |       |
| 7      | A     | -61.642  | -29.575  | 7.857  | 7.901  | 24.540  | 0.866 | 10    | 12    | Good     |       |
| 8      | V     | -87.788  | -29.510  | 22.135 | 19.183 | 33.695  | 0.879 | 10    | 12    | Good     |       |
| 9      | V     | -62.343  | -44.490  | 11.627 | 8.641  | 38.241  | 0.899 | 10    | 12    | Good     |       |
| 10     | V     | -57.283  | -49.013  | 9.122  | 6.502  | 67.345  | 0.910 | 10    | 11    | Good     |       |
| 11     | P     | -58.765  | -32.217  | 3.726  | 7.351  | 50.077  | 0.906 | 10    | 11    | Good     |       |
| 12     | I     | -69.461  | -35.619  | 8.229  | 10.015 | 40.895  | 0.900 | 10    | 11    | Good     |       |
| 13     | L     | -65.211  | -39.149  | 8.314  | 9.304  | 21.082  | 0.895 | 10    | 12    | Good     |       |
| 14     | F     | -61.870  | -45.733  | 4.441  | 7.094  | 19.693  | 0.884 | 10    | 12    | Good     |       |
| 15     | L     | -60.857  | -45.270  | 5.661  | 5.810  | 22.277  | 0.861 | 10    | 12    | Good     |       |
| 16     | I     | -70.985  | -36.867  | 8.025  | 8.858  | 67.231  | 0.846 | 10    | 8     | Good     |       |
| 17     | L     | -67.543  | -26.787  | 10.026 | 25.214 | 86.538  | 0.835 | 10    | 7     | Good     |       |
| 18     | L     | -63.943  | -41.482  | 4.025  | 2.855  | 66.985  | 0.845 | 10    | 6     | Good     |       |
| 19     | S     | -66.878  | -41.258  | 10.673 | 3.739  | 37.931  | 0.845 | 10    | 10    | Good     |       |
| 20     | L     | -65.636  | -42.763  | 5.571  | 8.732  | 33.385  | 0.851 | 10    | 10    | Good     |       |
| 21     | G     | -61.207  | -42.609  | 3.807  | 7.687  | 27.950  | 0.857 | 10    | 11    | Good     |       |
| 22     | V     | -61.722  | -44.934  | 3.373  | 4.369  | 35.367  | 0.872 | 10    | 10    | Good     |       |
| 23     | G     | -61.071  | -41.834  | 3.050  | 4.721  | 28.544  | 0.884 | 10    | 11    | Good     |       |
| 24     | F     | -65.144  | -42.513  | 6.289  | 6.900  | 26.628  | 0.894 | 10    | 11    | Good     |       |
| 25     | A     | -66.155  | -37.884  | 6.226  | 9.134  | 18.457  | 0.899 | 10    | 12    | Good     |       |
| 26     | I     | -65.680  | -45.207  | 4.161  | 4.367  | 17.515  | 0.883 | 10    | 12    | Good     |       |
| 27     | L     | -61.354  | -41.426  | 5.531  | 4.737  | 28.801  | 0.838 | 10    | 11    | Good     |       |
| 28     | Y     | -72.841  | -26.140  | 15.305 | 16.634 | 41.201  | 0.698 | 10    | 10    | Good     |       |
| 29     | T     | -89.553  | -15.215  | 17.482 | 27.637 | 92.748  | 0.639 | 7     | 6     | Warn     |       |
| 30     | K     | 9999.000 | 9999.000 | 0.000  | 0.000  | 0.000   | 0.000 | 0     | 3     | None     |       |
| 31     | H     | 9999.000 | 9999.000 | 0.000  | 0.000  | 0.000   | 0.000 | 0     | 0     | None     |       |
| 32     | R     | 9999.000 | 9999.000 | 0.000  | 0.000  | 0.000   | 0.000 | 0     | 0     | None     |       |
| 33     | R     | 9999.000 | 9999.000 | 0.000  | 0.000  | 0.000   | 0.000 | 0     | 3     | None     |       |
| 34     | L     | -62.534  | -35.943  | 7.882  | 32.900 | 73.943  | 0.688 | 10    | 7     | Good     |       |
| 35     | Q     | -59.975  | -39.614  | 6.851  | 9.972  | 30.001  | 0.718 | 10    | 11    | Good     |       |
| 36     | S     | -63.672  | -40.202  | 3.596  | 12.471 | 19.691  | 0.771 | 10    | 12    | Good     |       |
| 37     | S     | -62.907  | -38.521  | 4.034  | 3.492  | 20.904  | 0.806 | 10    | 12    | Good     |       |
| 38     | F     | -69.639  | -38.929  | 17.504 | 12.123 | 20.822  | 0.829 | 10    | 12    | Good     |       |
| 39     | T     | -60.064  | -42.002  | 7.139  | 7.022  | 20.258  | 0.851 | 10    | 12    | Good     |       |
| 40     | A     | -62.700  | -36.883  | 7.571  | 8.460  | 19.124  | 0.843 | 10    | 12    | Good     |       |
| 41     | F     | -64.563  | -43.446  | 6.273  | 8.305  | 19.127  | 0.817 | 10    | 12    | Good     |       |
| 42     | A     | -62.453  | -34.613  | 9.455  | 12.504 | 19.049  | 0.764 | 10    | 12    | Good     |       |
| 43     | N     | -75.730  | -25.581  | 16.967 | 20.147 | 22.719  | 0.728 | 10    | 12    | Good     |       |
| 44     | S     | -83.836  | -34.523  | 10.146 | 13.983 | 65.628  | 0.721 | 10    | 11    | Good     |       |
| 45     | H     | -92.044  | -27.790  | 25.009 | 17.127 | 47.608  | 0.740 | 10    | 11    | Good     |       |
| 46     | Y     | -70.330  | -36.699  | 13.439 | 9.888  | 54.348  | 0.732 | 10    | 10    | Good     |       |
| 47     | S     | -73.001  | -31.767  | 15.827 | 18.376 | 87.013  | 0.721 | 10    | 7     | Good     |       |
| 48     | S     | -70.143  | -25.742  | 19.504 | 31.201 | 104.312 | 0.714 | 10    | 6     | Good     |       |
| 49     | R     | -61.775  | -35.833  | 4.687  | 15.268 | 62.120  | 0.767 | 10    | 7     | Good     |       |
| 50     | L     | -67.063  | -31.975  | 6.823  | 10.519 | 37.315  | 0.771 | 10    | 10    | Good     |       |
| 51     | G     | -62.584  | -35.149  | 4.420  | 11.724 | 36.612  | 0.773 | 10    | 10    | Good     |       |
| 52     | S     | -69.030  | -34.777  | 13.063 | 14.937 | 35.184  | 0.762 | 10    | 10    | Good     |       |
| 53     | A     | -71.538  | -28.640  | 11.507 | 28.946 | 27.569  | 0.741 | 10    | 11    | Good     |       |
| 54     | I     | -74.103  | -33.141  | 13.813 | 15.352 | 31.860  | 0.720 | 10    | 11    | Good     |       |
| 55     | F     | -98.173  | -1.787   | 10.043 | 16.892 | 39.053  | 0.662 | 10    | 11    | Good     |       |

|    |   |          |          |        |        |        |       |    |    |      |
|----|---|----------|----------|--------|--------|--------|-------|----|----|------|
| 56 | S | -93.955  | 146.863  | 32.841 | 21.060 | 41.436 | 0.562 | 10 | 11 | Dyn  |
| 57 | S | -80.507  | 148.522  | 25.833 | 12.794 | 39.926 | 0.529 | 6  | 11 | Dyn  |
| 58 | G | 91.010   | 10.075   | 12.630 | 19.314 | 61.793 | 0.552 | 10 | 11 | Dyn  |
| 59 | D | -81.895  | 137.175  | 72.752 | 45.467 | 33.178 | 0.632 | 10 | 11 | Warn |
| 60 | D | -105.959 | 0.219    | 20.639 | 24.921 | 28.413 | 0.606 | 10 | 11 | Good |
| 61 | L | -67.388  | 142.950  | 56.215 | 14.443 | 46.108 | 0.424 | 10 | 10 | Dyn  |
| 62 | G | 93.838   | -9.700   | 14.437 | 14.862 | 88.198 | 0.414 | 10 | 10 | Dyn  |
| 63 | E | -79.267  | 139.997  | 70.627 | 44.274 | 38.697 | 0.465 | 10 | 11 | Dyn  |
| 64 | D | -76.847  | 123.252  | 64.434 | 58.034 | 28.486 | 0.701 | 6  | 11 | Warn |
| 65 | D | -71.259  | -29.926  | 26.661 | 24.688 | 67.886 | 0.753 | 10 | 8  | Good |
| 66 | E | -76.636  | -27.406  | 24.708 | 18.322 | 54.158 | 0.711 | 10 | 8  | Warn |
| 67 | D | -86.525  | 132.142  | 67.493 | 20.159 | 52.673 | 0.677 | 8  | 8  | Warn |
| 68 | A | -70.528  | 141.416  | 9.302  | 15.537 | 63.573 | 0.583 | 10 | 10 | Dyn  |
| 69 | P | -70.459  | 153.003  | 6.169  | 9.884  | 50.103 | 0.551 | 10 | 10 | Dyn  |
| 70 | M | -93.912  | 131.479  | 26.945 | 19.440 | 43.898 | 0.512 | 10 | 11 | Dyn  |
| 71 | I | -101.764 | 127.454  | 33.603 | 22.180 | 27.779 | 0.532 | 10 | 12 | Dyn  |
| 72 | T | -83.769  | 148.417  | 22.764 | 17.038 | 38.785 | 0.480 | 10 | 11 | Dyn  |
| 73 | G | 89.094   | 3.693    | 12.954 | 18.528 | 46.261 | 0.418 | 10 | 11 | Dyn  |
| 74 | F | -90.202  | 137.023  | 59.668 | 31.840 | 35.936 | 0.417 | 10 | 10 | Dyn  |
| 75 | S | -93.121  | 119.664  | 30.316 | 26.261 | 30.703 | 0.495 | 10 | 11 | Dyn  |
| 76 | D | -94.069  | -18.472  | 19.892 | 27.721 | 37.420 | 0.650 | 10 | 11 | Good |
| 77 | D | -77.542  | 127.140  | 61.253 | 28.349 | 68.177 | 0.728 | 9  | 8  | Warn |
| 78 | V | -104.922 | 124.099  | 20.498 | 16.264 | 92.039 | 0.718 | 10 | 6  | Good |
| 79 | P | -67.030  | 147.798  | 8.753  | 8.428  | 78.397 | 0.544 | 10 | 6  | Dyn  |
| 80 | M | -97.325  | 128.190  | 26.817 | 16.250 | 47.823 | 0.489 | 10 | 10 | Dyn  |
| 81 | V | -91.466  | 137.863  | 24.075 | 15.079 | 23.275 | 0.388 | 10 | 12 | Dyn  |
| 82 | I | -93.938  | 121.604  | 23.608 | 10.351 | 32.727 | 0.341 | 10 | 11 | Dyn  |
| 83 | A | 9999.000 | 9999.000 | 0.000  | 0.000  | 0.000  | 0.000 | 0  | 7  | None |

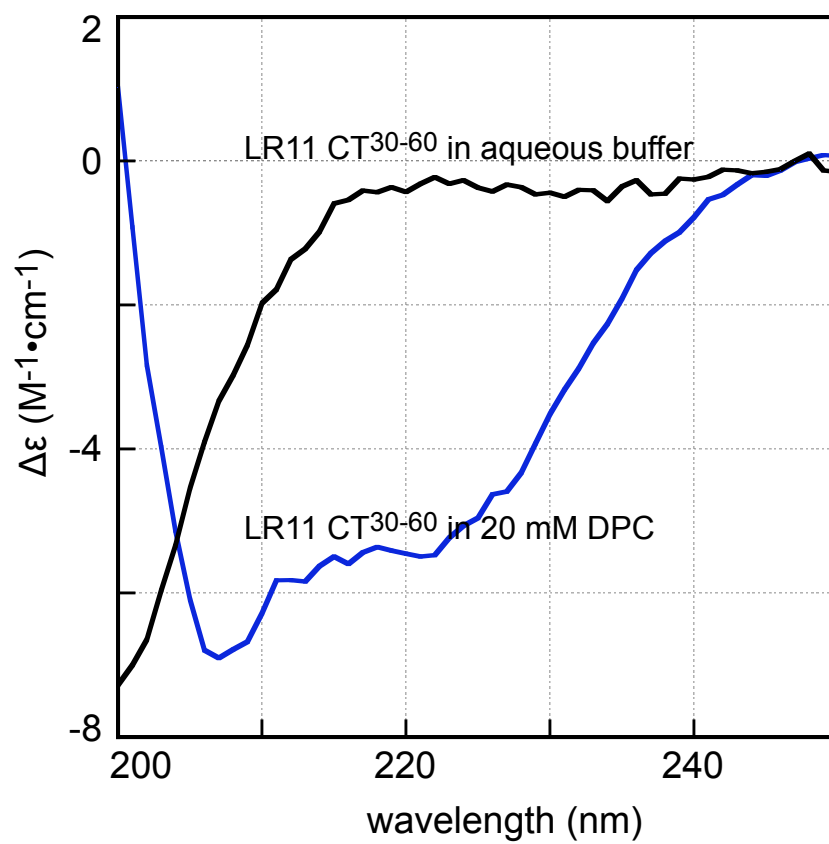

**Figure S4:** CD spectra of LR11 CT<sup>30-60</sup> peptide in aqueous solution and DPC micelles.
